# Supplementary material for: Genomic analysis of exceptional responder to regorafenib in treatment-refractory metastatic rectal cancer: a case report and review of the literature
Source: PubMed Central journal article supplement (PMC5593691; doi:10.18632/oncotarget.18357), 2017-06-03
Supplement: oncotarget-08-57882-s001.pdf [file oncotarget-08-57882-s001.pdf]

# Genomic analysis of exceptional responder to regorafenib in treatment-refractory metastatic rectal cancer: a case report and review of the literature

## SUPPLEMENTARY MATERIALS

Supplementary Table1: NGS panel results including full details of mutations noted in Table 1 from body of manuscript in a patient with an exceptional response to regorafenib.

|                   | Platform | Gene             | Allele frequency (%) | Chromosome | Standardized Nomenclature (HGVS)         | Location | DNA change | Protein change | dbSNP ID    | COSMIC ID  |
|-------------------|----------|------------------|----------------------|------------|------------------------------------------|----------|------------|----------------|-------------|------------|
| Diagnostic biopsy | T200     | KRAS             | 34.72                | 12         | NM_033360.3(KRAS):c.34G>A p.G12S         | Exon 2   | SNV        | Missense       | rs121913530 | COSM517    |
|                   |          | TP53             | 38.44                | 17         | NM_000546.5(TP53):c.817C>T p.R273C       | Exon 8   | SNV        | Missense       | rs121913343 | COSM10659  |
|                   |          | APC              | 12.04                | 5          | NM_000038.5(APC):c.4348C>T p.R1450*      | Exon 15  | SNV        | Nonsense       | rs121913332 | COSM13127  |
|                   |          | APC              | 44.8                 | 5          | NM_001127511.2(APC):c.2224delA p.I742fs* | Exon 15  | SNV        | Frameshift     | NA          | NA         |
|                   |          | FLT4             | 21.38                | 5          | NM_182925(FLT4):c.392T>C p. F131S        | Exon 3   | SNV        | Missense       | NA          | NA         |
|                   |          | PPP1R3A          | 5.33                 | 7          | NM_002711(PPP1R3A):c.813A>C p.E271D      | Exon 2   | SNV        | Missense       | NA          | NA         |
| During treatment  | T200.1   | KRAS             | 50                   | 12         | NM_004985.3(KRAS):c.34G>A p.G12S         | Exon 2   | SNV        | Missense       | rs121913530 | COSM517    |
|                   |          | TP53             | 76.92                | 17         | NM_001126116.1(TP53):c.817C>T p.R273C    | Exon 8   | SNV        | Missense       | rs121913343 | COSM10659  |
|                   |          | APC              | 53.16                | 5          | NM_001127511.2(APC):c.2224delA p.I742fs* | Exon 15  | SNV        | Frameshift     | NA          | NA         |
|                   |          | ATR              | 11.59                | 3          | NM_001184.3(ATR):c.2320delA p.I774fs*    | Exon 10  | SNV        | Frameshift     | NA          | COSM214499 |
| After progression | T200.1   | KRAS             | 22.76                | 12         | NM_004985.3(KRAS):c.34G>A p.G12S         | Exon 2   | SNV        | Missense       | rs121913530 | COSM517    |
|                   |          | TP53             | 28.69                | 17         | NM_001126116.1(TP53):c.817C>T p.R273C    | Exon 8   | SNV        | Missense       | rs121913343 | COSM10659  |
|                   |          | APC              | 28.63                | 5          | NM_001127511.2(APC):c.2224delA p.I742fs* | Exon 15  | SNV        | Frameshift     | NA          | NA         |
|                   |          | EP300            | 16.74                | 22         | NM_001429.3(EP300):c.5263c>G p.L1755V    | Exon 31  | SNV        | Missense       | NA          | NA         |
|                   |          | WHSC1L1          | 15.08                | 8          | NM_023034.1(WHSC1L1):c.367G>C p.E123Q    | Exon 2   | SNV        | Missense       | NA          | NA         |
|                   |          | Guardant 360     | Major alterations    |            |                                          |          |            |                |             |            |
|                   |          | KRAS             | 13.73                | 12         | NM_033360.2(KRAS):c.34G>A p.G12S         | Exon 2   | SNV        | Missense       | rs121913530 | COSM517    |
|                   |          | TP53             | 27.94                | 17         | NM_000546.5(TP53):c.817C>T p.R273C       | Exon 8   | SNV        | Missense       | rs121913343 | COSM10659  |
|                   |          | KIT              | 2.97                 | 4          | NM_000222.2:c.2881G>A p.G961S            |          | SNV        | Missense       | rs773828910 | NA         |
|                   |          | Minor alteration |                      |            |                                          |          |            |                |             |            |
|                   |          | TP53             | 0.26                 | 17         | NM_000546.5(TP53):c.524G>A p.R175H       | Exon5    | SNV        | Missense       | rs28934578  | COSM10648  |
|                   |          | APC              | 0.70                 | 5          | NM_001127511.2(APC):c.2224delA p.I742fs* | Exon 15  | SNV        | Frameshift     | NA          | NA         |

KRAS;Kirsten rat sarcoma viral oncogene homolog, TP53; tumor protein p53, APC; adenomatous polyposis coli, FLT4; Fms-Related Tyrosine Kinase, PPP1R3A; protein phosphatase 1 regulatory subunit 3A, ATR; ataxia telangiectasia and Rad3 related, EP300; E1A binding protein p300, WHSC1L1; Wolf-Hirschhorn Syndrome Candidate 1-Like 1, KIT; KIT proto-oncogene receptor tyrosine kinase
